# Supplementary material for: Chromium complexes containing a tetradentate [OSSO]-type bisphenolate ligand as a novel family of catalysts for the copolymerization of carbon dioxide and 4-vinylcyclohexene oxide
Source: Royal Society of Chemistry journal article supplement (doi:10.1039/c5ra27373k), 2016-01-01
Supplement: c5ra27373k1.pdf [file c5ra27373k1.pdf]

## SUPPORTING INFORMATION

### **Chromium Complexes Containing Tetradentate [OSSO]-type Bisphenolate Ligand as a Novel Family of Catalyst for the Copolymerization of Carbon Dioxide and 4-Vinylcyclohexene Oxide**

*Gaoshan Si,<sup>b</sup> Li Zhang,<sup>a</sup> Bing Han,<sup>a</sup> Hongye Zhang,<sup>a</sup> Xiangqing Li,<sup>\*b</sup> and Binyuan Liu<sup>\*a</sup>*

*<sup>a</sup> Department of Polymer Science and Engineering, Hebei University of Technology, Tianjin 300130, China; Tel: +86 22 6020 4305; E-mail: byliu@hebut.edu.cn*

*<sup>b</sup> School of Chemical and Environmental Engineering, Shanghai Institute of Technology, 100 Haiquan Road, Shanghai 201418, China; Tel: +86 21 6087 3061; Email: xqli@sit.edu.cn.*

**Fig. S1** The <sup>1</sup>H NMR spectrum of PVCHC obtained from complex 3 (entry 3 in Table 1)

**Fig. S2** IR spectra of PPNCI and the mixture of complex 2 with 1 equiv. of PPNCI

**Fig. S3** DSC curve of PVCHC

**Fig. S4** Typical GPC curve of PVCHC

**Fig.S5** Plots of Mn and PDI as a function of VCHO conversion using complex 1/PPNCI as catalyst

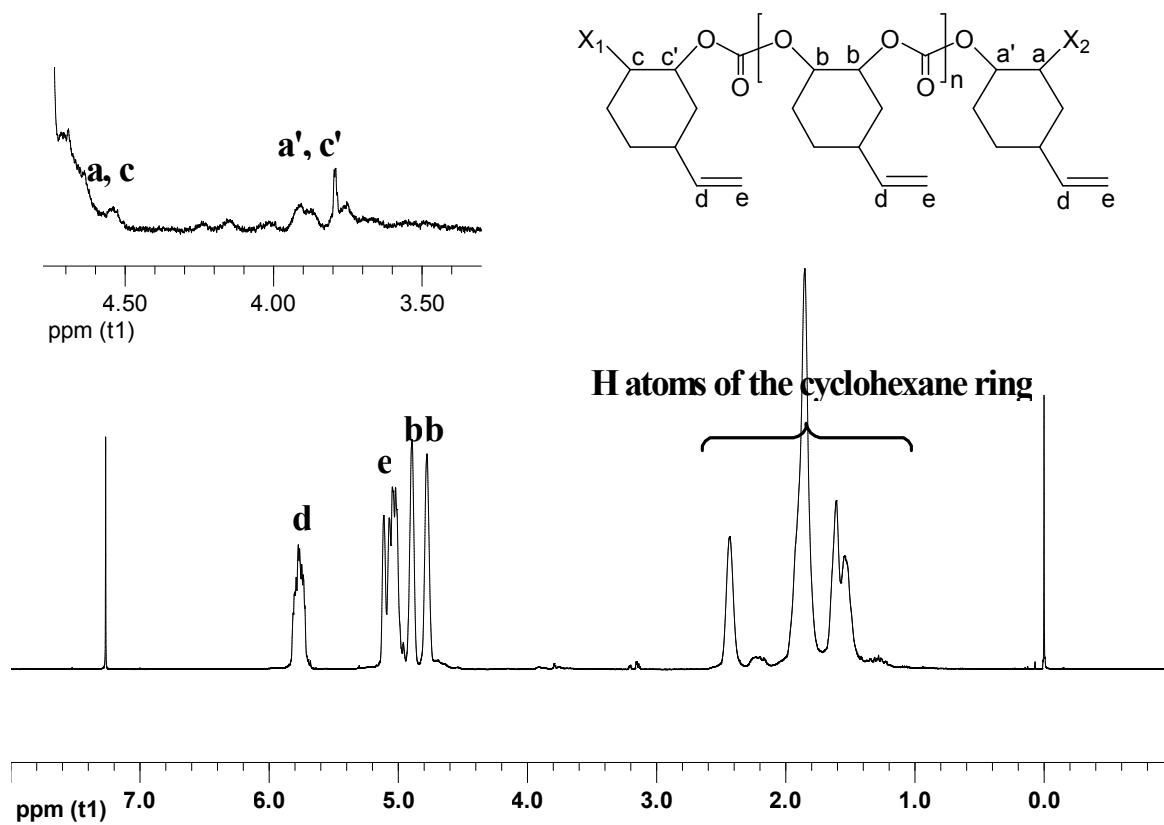

**Fig. S1** The  $^1\text{H}$  NMR spectrum of PVCHC obtained from complex 3 (entry 3 in Table 1)

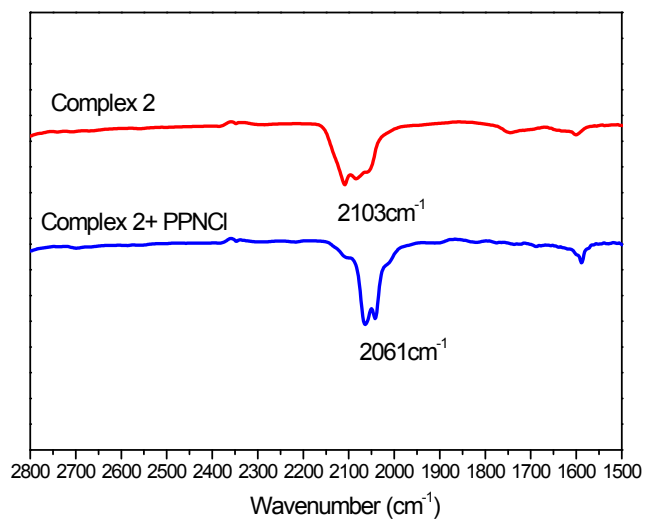

**Fig. S2** IR spectra of PPNCI and the mixture of complex 2 with 1 equiv. of PPNCI

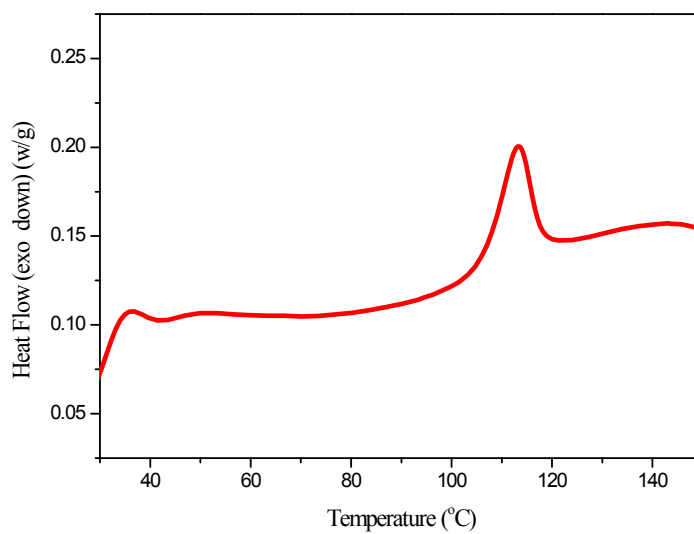

**Fig. S3** DSC curve of PVCHC

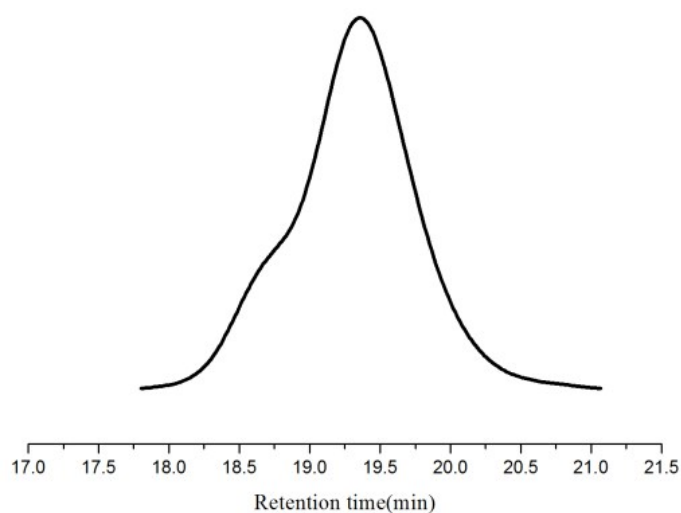

**Fig. S4** Typical GPC curve of PVCHC

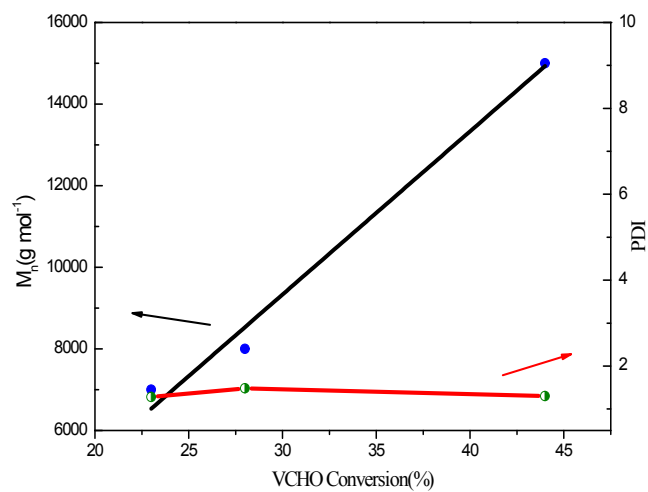

**Fig.S5** Plots of  $M_n$  and PDI as a function of VCHO conversion using complex 1/PPNCl as catalyst. Conditions: VCHO/Complex 1/PPNCl=1000: 1:2 (molar ratio), 90 °C, VCHO (12.4g, 0.1 mol)
